# Supplementary material for: Water–lipid interface in lipidic mesophases with excess water
Source: Royal Society of Chemistry journal article supplement (doi:10.1039/d3fd00118k), 2023-06-29
Supplement: d3fd00118k1.pdf [file d3fd00118k1.pdf]

## Supporting Information

### Water-Lipid Interface in Lipidic Mesophases with Excess Water

Yang Yao,<sup>1a</sup> Sara Catalini,<sup>2,3a</sup> Paolo Foggi,<sup>2,3</sup> and Raffaele Mezzenga<sup>1,4\*</sup>

<sup>1</sup>*Department of Health Sciences and Technology, ETH Zürich, 8092 Zurich, Switzerland*

<sup>2</sup>*European Laboratory for Non-Linear Spectroscopy, LENS, 50019, Firenze, Italy*

<sup>3</sup>*Department of Chemistry, University of Perugia, Via Elce di Sotto 8, 06123 Perugia, Italy*

<sup>4</sup>*Department of Materials, ETH Zurich, 8093 Zürich, Switzerland*

<sup>a</sup>These authors contributed equally: Yang Yao, Sara Catalini

\* Authors for correspondence: E-mail: [raffaele.mezzenga@hest.ethz.ch](mailto:raffaele.mezzenga@hest.ethz.ch)

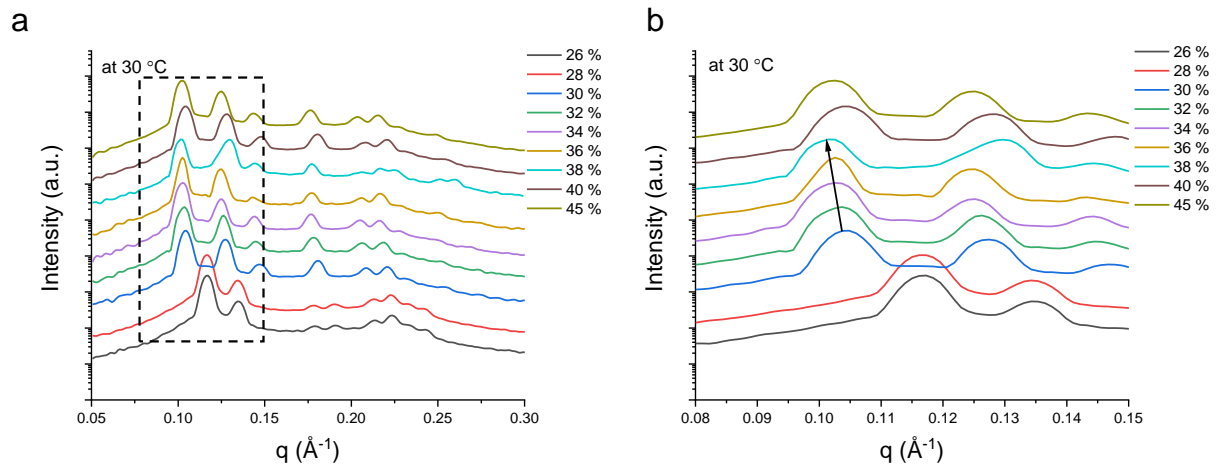

Figure S1. (a) Comparison of SAXS profiles of monolinolein-based lipidic mesophase with different water fractions obtained at 30 °C. Figure S2 (b) is the magnification of (a) in the dashed frame region.

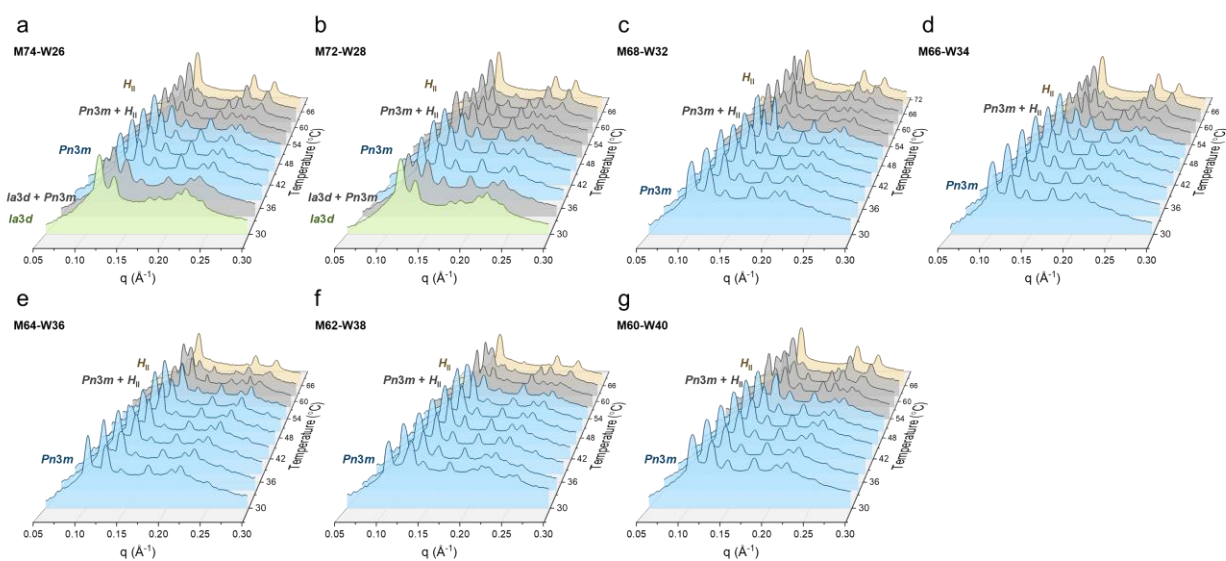

Figure S2. SAXS profiles of (a) M74-W26, (b) M72-W28, (c) M68-W32, (d) M66-W34, (e) M64-W36, (f) M62-W38, and (g) M60-W40 as a function of temperature.

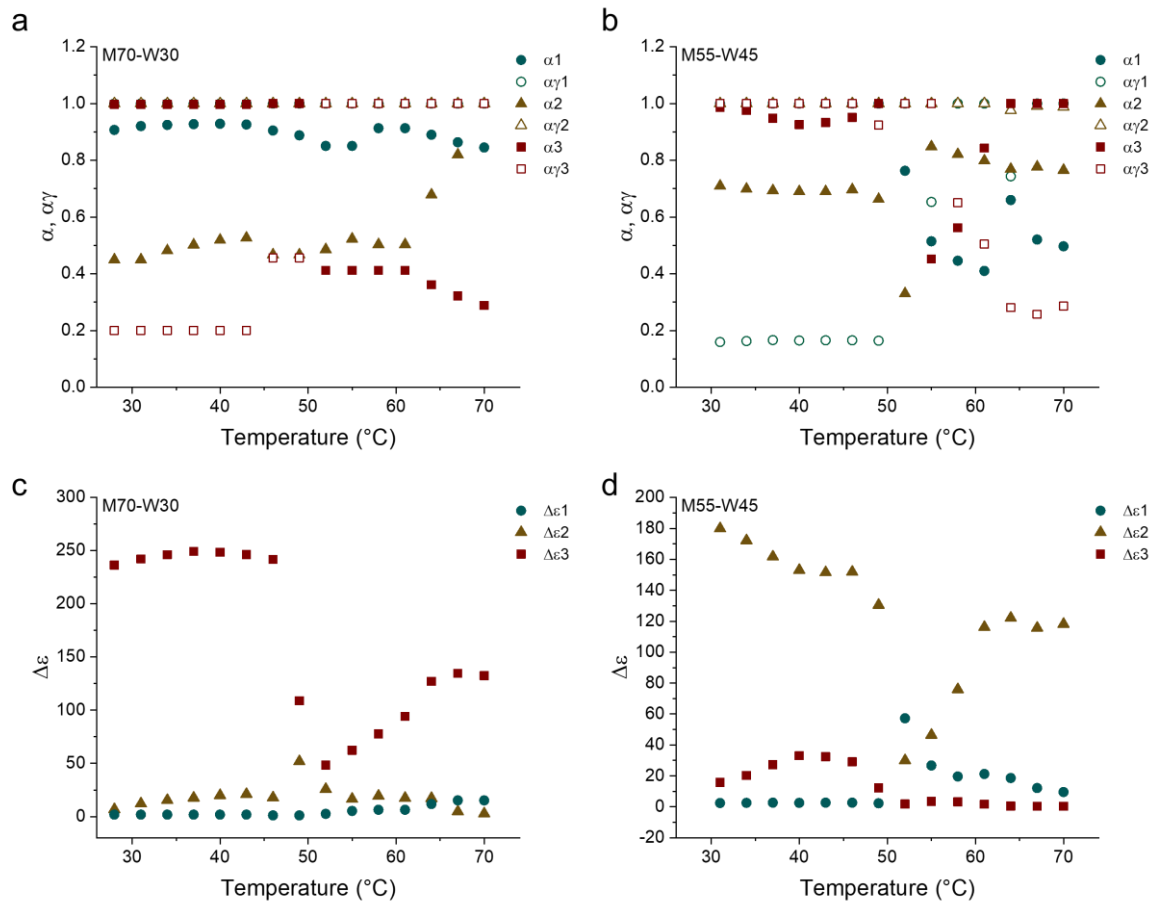

Figure S3.  $\alpha$ ,  $\alpha\gamma$  parameters obtained from fitting of dielectric spectra for (a) M70-W30 and (b) M55-W45. Intensity of dielectric loss ( $\Delta\epsilon$ ) obtained from fitting of dielectric spectra for (c) M70-W30 and (d) M55-W45.
